# Supplementary material for: The Great Oxidation Event preceded a Paleoproterozoic “snowball Earth”
Source: PubMed Central journal article supplement — Proc Natl Acad Sci U S A. 2020 Jun 1;117(24):13314–20. doi: 10.1073/pnas.2003090117 (PMC7306805; doi:10.1073/pnas.2003090117), 2020-06-01
Supplement: pnas.2003090117.sapp.pdf [file pnas.2003090117.sapp.pdf]

# PNAS

[www.pnas.org](http://www.pnas.org)

Supplementary Information for

The Great Oxidation Event preceded a Paleoproterozoic snowball Earth

Matthew R. Warke, Tommaso Di Rocco, Aubrey L. Zerkle, Aivo Lepland, Anthony R. Prave,  
Adam P. Martin, Yuichiro Ueno, Daniel J. Condon and Mark W. Claire

Corresponding author name: Matthew Warke

Email: [mw438@st-andrews.ac.uk](mailto:mw438@st-andrews.ac.uk)

**This PDF file includes:**

Supplementary text  
Figures S1 to S2  
Tables S1 to S3  
Legend for Datasets S1  
SI References

**Other supplementary materials for this manuscript include the following:**

Dataset S1

## Supplementary Information Text

### Methods

Core sampling of FAR-DEEP cores 1A and 3A was conducted at the core repository at the Geological Survey of Norway, and all samples were assigned an International Geo Sample Number (IGSN) in-line with sampling procedures (1). Core samples were cut perpendicular to bedding and a portion of the core was crushed and milled to a fine powder using an agate ball mill. The two-step sequential extraction of acid volatile sulfur (AVS) and then chrome reducible sulfur (CRS) phases was achieved by first refluxing the sample with 6 M HCl followed by (when the reaction is complete) refluxing with acidified 1M CrCl<sub>2</sub> (2–4). Evolved sulfide was captured using a 1 M AgNO<sub>3</sub> solution to form Ag<sub>2</sub>S.

For δ<sup>34</sup>S analysis Ag<sub>2</sub>S samples were placed in tin capsules and loaded into a Costech Zero Blank autosampler and then dropped into a 1020 °C reactor tube where they combusted in the presence of O<sub>2</sub>. Combustion products were carried by helium stream through tungstic oxide combustion catalysts and copper wire was used as a reductant for any excess O<sub>2</sub>. Water was removed by using a magnesium perchlorate trap at room temperature before entering a GC column for gas separation. A Thermo ConFlo IV allowed connection between Thermo Isolink Elemental Analyser and MAT 253 IRMS by an open split interface, which ensures constant pressure in the source. The resulting SO<sub>2</sub> gas was measured in continuous flow mode at the University of St Andrews, Scotland, (*Methodology*) and analytical uncertainty for δ<sup>34</sup>S was better than 0.3 ‰ (1σ).

Measured isotopic compositions were calibrated to CDT scale by bracketing Ag<sub>2</sub>S samples with international reference standards (IAEA-S2, IAEA-S3). Results are expressed in standard delta notation relative to Vienna Canyon Diablo Troilite (VCDT) (5):

$$\delta^{3X}S = 1000 * \left[ \left( \frac{{}^{3X}S}{{}^{32}S} \right)_{\text{sample}} / \left( \frac{{}^{3X}S}{{}^{32}S} \right)_{\text{V-CDT}} - 1 \right] \quad (1)$$

where X can equal 3, 4, or 6 depending on the isotope being analysed.

For δ<sup>33</sup>S and δ<sup>36</sup>S analysis (and calculation of Δ<sup>33</sup>S and Δ<sup>36</sup>S values), approximately 0.4-0.5 mg of Ag<sub>2</sub>S and ~40-50 mg CoF<sub>3</sub> was weighed into an iron-nickel-cobalt alloy foil (pyrofoil) in ~1:100 ratio and the pyrofoil was tightly folded, sealed and placed in a glass reaction tube. Approximately 1 g of NaF crystals were added to the tube in order to consume HF and produce NaHF<sub>2</sub>. The reaction tube was attached to a vacuum line and placed within a JHP-22 Curie-point pyrolyzer (CPP) (JAI, Japan). The CPP employs induction heating to rapidly heat the pyrofoil which loses its ferromagnetic property at 590°C (6). The glass reactor was pumped down to ~3 x10<sup>-3</sup> mbar and the position of the pyrofoil was carefully matched to the center of the induction coil to ensure efficient reaction. In an update of ref (6), we performed three pyrolysis reactions per sample, maintaining temperature for 99 seconds, for a total of 297 s of reaction time. This increases total SF<sub>6</sub> yields from ~20-30 % to 40-70 %, thus reducing the Ag<sub>2</sub>S sample size needed.

The SF<sub>6</sub> was separated from other gas phases produced in the fluorination reaction (e.g., O<sub>2</sub>, HF, CO) by passing the gases through a series of cryogenic freezing steps using both liquid N<sub>2</sub> (-196 °C) and a liquid N<sub>2</sub>-ethanol slurry (-95 °C) in a procedure similar to that described previously (Ueno et al., 2015). SF<sub>6</sub> was then passed through a SRI 8610C gas chromatograph to ensure complete separation from other products. The GC is equipped with a 12 ft HayeSep Q packed column (1/8" OD, 80–100 mesh) and a 12 ft Molecular Sieves 5A packed column (1/8" OD, 60–80 mesh) operating at a He flow rate of 24 ml/min and at a temperature of 80 °C (Ono et al., 2006). SF<sub>6</sub> gas elutes after approximately 26 minutes and is detected by a thermal conductivity detector (TCD). Purified SF<sub>6</sub> was frozen in a glass Hungate tube at liquid N<sub>2</sub> temperature and transferred to the MAT253 microvolume inlet (packed with ~20 1 mm stainless-steel ball bearings in order to increase

total gas pressure) and then expanded into the mass spectrometer source at room temperature. The MAT253 dedicated for minor sulfur isotope measurements is equipped with four Faraday cups with  $3 \times 10^8$ ,  $3 \times 10^{10}$ ,  $10^{10}$  and  $10^{12}$   $\Omega$  feedback resistors for simultaneous measurement of  $m/z$  127, 128, 129 and 131. Sample gas was analyzed and compared to reference  $\text{SF}_6$  gas after adjusting the reference bellow volume to obtain equal signal intensity, normally between 3.5 and 5.5 V on  $m/z$  127, for both sample and reference side.

Variations in sulfur isotope ratios are expressed in the  $\delta$  notation (equation 1) relative to VCDT (5). For mass dependent processes  $\delta^{33}\text{S} \approx 0.515 \times \delta^{34}\text{S}$ , and  $\delta^{36}\text{S} \approx 1.90 \times \delta^{34}\text{S}$  (7). Deviations from these predicted quadruple sulfur isotope relationships are expressed using  $\Delta^{33}\text{S}$  and  $\Delta^{36}\text{S}$  notation, where:

$$\Delta^{33}\text{S} = 1000 * [\ln\left(\frac{\delta^{33}\text{S}}{1000} + 1\right) - 0.515 * \ln\left(\frac{\delta^{34}\text{S}}{1000} + 1\right)] \quad (2)$$

$$\Delta^{36}\text{S} = 1000 * [\ln\left(\frac{\delta^{36}\text{S}}{1000} + 1\right) - 1.9 * \ln\left(\frac{\delta^{34}\text{S}}{1000} + 1\right)] \quad (3)$$

Longer term analytical uncertainty is calculated from 64 measurements of IAEA-S1 conducted over 10 months. IAEA-S1  $\Delta^{33}\text{S}$  and  $\Delta^{36}\text{S}$  values were  $0.116 \pm 0.015$  ‰ and  $-0.572 \pm 0.177$  ‰ (mean  $\pm 1\sigma$ ), respectively (Dataset S1) and are within uncertainty of values reported in other studies (6, 8–10). The long term  $1\sigma$  standard error serves as a minimum error magnitude on each datapoint. The precision of a single measurement is typically in the range of 0.010 ‰ for  $\delta^{33}\text{S}$  and  $\delta^{34}\text{S}$  and 0.100 ‰ for  $\delta^{36}\text{S}$  determined from IAEA-S1.

Linear regression is a common methodology for determining the  $\Delta^{36}\text{S}/\Delta^{33}\text{S}$  slope of a series of data points on a scatter plot but has some limitations. Linear regression only considers errors in the vertical coordinate when determining the best fit slope and therefore does not produce a meaningful estimate of the uncertainty of the slope. When discussing  $\Delta^{36}\text{S}/\Delta^{33}\text{S}$  slopes we use linear regression for comparison with previous studies, but also discuss results using orthogonal data regression (ODR). This technique incorporates errors in both the abscissa and ordinate and quantifies the uncertainty in the determination of the resulting slope, which can be quite large for small magnitude data.

Computations were carried out using the `odr` module from the `scipy` package within python 3.7.6. We assert that ODR allows for expanded interpretation compared to previous work in the field utilizing linear regression, but users must exert some care in some situations. In particular, the method is known to overpredict slopes if the underlying data is not linearly related (11) as the data in Fig 2C may not be. More broadly, there is no *a priori* reason to consider that true relationship between  $\Delta^{36}\text{S}$  and  $\Delta^{33}\text{S}$  is linear. Indeed, (mass-dependent) mass-conservation effects are known to cause a non-linear relationship between these variables (12), so use of ODR for prediction of slope (and associated error) in MDF data sets may be susceptible to enhanced ‘equation error’ (11).

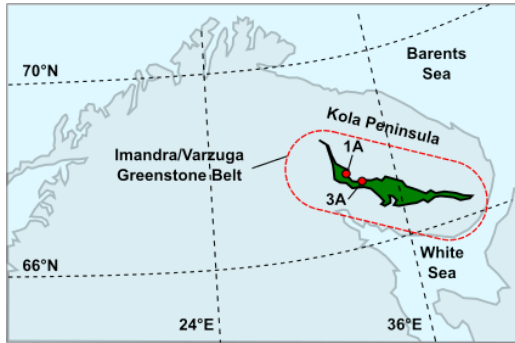

**Fig. S1. Regional map showing the location of the Imandra/Varzuga Greenstone Belt on the Kola Peninsula (NW Russian Federation) and the position of FAR-DEEP drillcores 1A and 3A; modified after (13).**

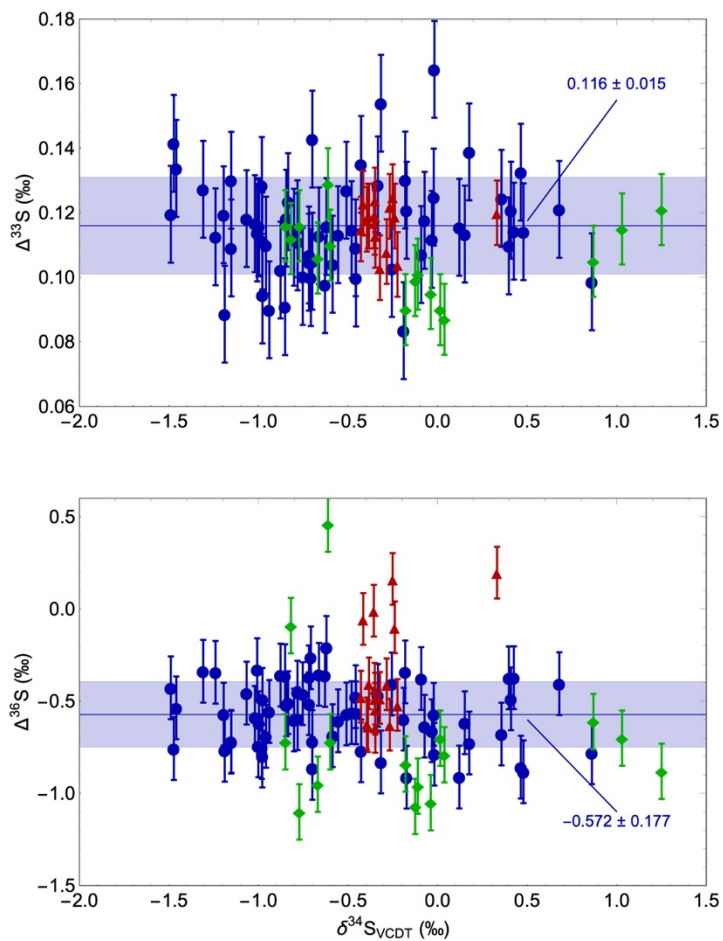

**Fig. S2.**  $\Delta^{33}\text{S}$  and  $\delta^{34}\text{S}$  values (upper panel) and  $\Delta^{36}\text{S}$  and  $\delta^{34}\text{S}$  values (lower panel) of IAEA-S1. Blue circles represent data from the University of St Andrews (this study; Dataset S1). Green diamonds and red triangles represent IAEA-S1 data from refs (6) and (10), respectively. Horizontal blue line shows the mean IAEA-S1 value measured at St Andrews; shaded blue areas represent a  $1\sigma$  envelope around the mean.

**Table S1.** sample metadata and quadruple sulfur isotope data from the Seidorechka Sedimentary Formation (n=24); 'err' signifies a 1 $\sigma$  error

| Sample       | Rock type       | Member                     | Depth  | $\Delta^{33}\text{S}$ | $\Delta^{36}\text{S}$ | $\Delta^{33}\text{S}$ err | $\Delta^{36}\text{S}$ err | $\delta^{34}\text{S}$ | $\delta^{34}\text{S}$ err |
|--------------|-----------------|----------------------------|--------|-----------------------|-----------------------|---------------------------|---------------------------|-----------------------|---------------------------|
| LOK003116224 | Siltstone       | Shale member               | 71.76  | -0.182                | -0.330                | 0.018                     | 0.198                     | -7.5                  | 0.3                       |
| REQ003117152 | Siltstone-shale | Shale member               | 73.91  | -0.291                | 0.553                 | 0.020                     | 0.198                     | -8.1                  | 0.3                       |
| PML3111706_1 | Siltstone       | Shale member               | 85.93  | -0.071                | -0.496                | 0.025                     | 0.198                     | -6.4                  | 0.3                       |
| LOK003116232 | Shale           | Shale member               | 89.83  | -0.034                | -0.259                | 0.025                     | 0.264                     | -4.6                  | 0.3                       |
| PML3100540_1 | Siltstone-shale | Shale member               | 95.62  | -0.161                | 0.149                 | 0.018                     | 0.198                     | -9.1                  | 0.3                       |
| LOK003116264 | Siltstone       | Shale member               | 108.08 | -0.102                | -0.143                | 0.018                     | 0.198                     | -8.6                  | 0.3                       |
| LOK003116268 | Shale           | Shale member               | 110.69 | -0.057                | 0.417                 | 0.018                     | 0.198                     | -8.2                  | 0.3                       |
| LOK003116270 | Shale           | Shale member               | 111.88 | -0.231                | -0.066                | 0.018                     | 0.198                     | -4.7                  | 0.3                       |
| LOK003116276 | Siltstone-shale | Limestone-shale member     | 121.68 | 0.033                 | -0.315                | 0.018                     | 0.198                     | -0.6                  | 0.3                       |
| LOK003116278 | Siltstone-shale | Limestone-shale member     | 123.03 | -0.013                | 0.009                 | 0.020                     | 0.198                     | -0.2                  | 0.3                       |
| LOK003116286 | Limestone-shale | Limestone-shale member     | 129.25 | 0.251                 | -0.365                | 0.029                     | 0.198                     | -2.2                  | 0.3                       |
| LOK003116292 | Limestone-shale | Limestone-shale member     | 133.76 | -0.116                | 0.154                 | 0.018                     | 0.198                     | 1.6                   | 0.3                       |
| LOK003116298 | Shale           | Limestone-shale member     | 138.73 | -0.018                | -0.613                | 0.018                     | 0.198                     | -5.6                  | 0.3                       |
| REQ003117120 | Siltstone-shale | Limestone-shale member     | 141.4  | -0.190                | 0.245                 | 0.019                     | 0.198                     | -7.6                  | 0.3                       |
| LOK003116374 | Shale           | Limestone-shale member     | 142.81 | -0.181                | 0.690                 | 0.020                     | 0.198                     | -7.8                  | 0.3                       |
| LOK003116378 | Siltstone-shale | Quartzite member           | 147    | -0.362                | 0.172                 | 0.023                     | 0.198                     | -8.5                  | 0.3                       |
| LOK003116380 | Shale-sandstone | Quartzite member           | 147.81 | -0.294                | 0.567                 | 0.018                     | 0.198                     | -6.6                  | 0.3                       |
| REQ003117124 | Siltstone       | Quartzite member           | 155.32 | -0.336                | 0.199                 | 0.018                     | 0.198                     |                       |                           |
| REQ003117126 | Sandstone       | Quartzite member           | 156.49 | -0.425                | 1.058                 | 0.018                     | 0.198                     | -9.4                  | 0.3                       |
| LOK003116382 | Siltstone       | Sandstone-siltstone member | 163.37 | -0.163                | 0.397                 | 0.018                     | 0.198                     | -9.4                  | 0.3                       |
| LOK003116384 | Shale           | Sandstone-siltstone member | 167.65 | -0.152                | 0.069                 | 0.018                     | 0.233                     | -7.0                  | 0.3                       |
| LOK003116390 | Shale           | Sandstone-siltstone member | 173.33 | -0.084                | 0.355                 | 0.018                     | 0.198                     | -10.3                 | 0.3                       |
| LOK003116392 | Shale           | Sandstone-siltstone member | 177.61 | -0.063                | 0.017                 | 0.031                     | 0.198                     | -10.9                 | 0.3                       |
| REQ003117136 | Shale           | Sandstone-siltstone member | 186.53 | -0.197                | -0.079                | 0.018                     | 0.198                     | -14.6                 | 0.3                       |

**Table S2.** sample metadata and quadruple sulfur isotope data from the Polisarka Sedimentary Formation (n=23); 'err' signifies a 1 $\sigma$  error

| Sample       | Rock type       | Member                      | Depth  | $\Delta^{33}\text{S}$ | $\Delta^{36}\text{S}$ | $\Delta^{33}\text{S}$ err | $\Delta^{36}\text{S}$ err | $\delta^{34}\text{S}$ | $\delta^{34}\text{S}$ err |
|--------------|-----------------|-----------------------------|--------|-----------------------|-----------------------|---------------------------|---------------------------|-----------------------|---------------------------|
| REQ003117014 | Shale           | Greywacke-Diamictite Member | 99.32  | 0.083                 | -0.419                | 0.025                     | 0.198                     | -0.8                  | 0.3                       |
| REQ003117022 | Diamictite      | Greywacke-Diamictite Member | 102.42 | -0.004                | -0.623                | 0.018                     | 0.198                     | 0.0                   | 0.3                       |
| REQ003117024 | Diamictite      | Greywacke-Diamictite Member | 104.67 | 0.010                 | -0.387                | 0.018                     | 0.198                     | -0.8                  | 0.3                       |
| REQ003117032 | Diamictite      | Greywacke-Diamictite Member | 109.64 | 0.002                 | -0.493                | 0.018                     | 0.198                     | -0.4                  | 0.3                       |
| REQ003117036 | Diamictite      | Greywacke-Diamictite Member | 111.23 | 0.075                 | -1.055                | 0.018                     | 0.198                     | -0.4                  | 0.3                       |
| REQ003117046 | Greywacke       | Greywacke-Diamictite Member | 115.56 | 0.021                 | -0.951                | 0.018                     | 0.198                     | -1.6                  | 0.3                       |
| REQ003117054 | Greywacke       | Greywacke-Diamictite Member | 119.53 | 0.028                 | 0.739                 | 0.024                     | 0.198                     | -3.9                  | 0.3                       |
| REQ003117056 | Greywacke       | Greywacke-Diamictite Member | 121.25 | 0.022                 | -0.202                | 0.018                     | 0.198                     | -4.0                  | 0.3                       |
| REQ003117060 | Dolarenite      | Limestone Member            | 124.37 | -0.378                | 0.545                 | 0.018                     | 0.198                     | -8.5                  | 0.3                       |
| REQ003117066 | Shale*          | Limestone Member            | 174.63 | 0.029                 | 0.343                 | 0.018                     | 0.198                     | -11.5                 | 0.3                       |
| REQ003117074 | Calcarenite     | Limestone Member            | 181.44 | 0.042                 | 0.376                 | 0.018                     | 0.198                     | -12.0                 | 0.3                       |
| REQ003117076 | Calcarenite     | Limestone Member            | 183.19 | 0.049                 | 0.534                 | 0.020                     | 0.198                     | -17.0                 | 0.3                       |
| REQ003117078 | Limestone-shale | Limestone Member            | 186.63 | 0.045                 | 0.243                 | 0.022                     | 0.198                     | -26.6                 | 0.3                       |
| REQ003117080 | Limestone-shale | Limestone Member            | 187.48 | 0.053                 | 0.256                 | 0.022                     | 0.198                     |                       |                           |
| REQ003117084 | Limestone-shale | Limestone Member            | 191.07 | 0.046                 | 0.628                 | 0.020                     | 0.198                     | -22.1                 | 0.3                       |
| REQ003117086 | Limestone-shale | Limestone-shale             | 193.06 | 0.037                 | 0.527                 | 0.018                     | 0.198                     | -17.9                 | 0.3                       |
| REQ003117088 | Limestone-shale | Limestone Member            | 193.49 | 0.036                 | 0.457                 | 0.018                     | 0.198                     |                       |                           |
| REQ003117092 | Limestone-shale | Limestone Member            | 195.96 | 0.034                 | 0.591                 | 0.018                     | 0.198                     | -18.7                 | 0.3                       |
| REQ003117118 | Limestone-shale | Limestone Member            | 200.47 | 0.033                 | 0.752                 | 0.018                     | 0.198                     | -19.0                 | 0.3                       |
| REQ003117096 | Limestone       | Limestone Member            | 200.66 | 0.033                 | 0.537                 | 0.025                     | 0.198                     |                       |                           |
| REQ003117104 | Shale           | Limestone Member            | 205.42 | 0.041                 | 0.345                 | 0.029                     | 0.198                     | -10.2                 | 0.3                       |
| 3103896_1_3  | Limestone-shale | Limestone Member            | 212.88 | 0.044                 | 0.213                 | 0.027                     | 0.243                     | -10.8                 | 0.3                       |
| REQ003117116 | Calcarenite     | Limestone Member            | 228.13 | 0.040                 | 0.487                 | 0.045                     | 0.302                     |                       |                           |

**Table S3.** references and background information for stratigraphic correlation of S-MIF and S-MDF strata in Fig. 4

| <b>Fig 4.<br/>Reference</b> | <b>Age (Ma)</b> | <b>Method</b>                       | <b>Target Sucession</b>                                   | <b>Reference(s)</b>                           |
|-----------------------------|-----------------|-------------------------------------|-----------------------------------------------------------|-----------------------------------------------|
| 1                           | 2312.7 ± 5.6    | N-TIMS Re-Os                        | Meteorite Bore member, Turee Creek Group, W. Australia    | Philippot et al., 2018                        |
| 2                           | 2450 ± 3        | LA-ICP-MS U-Pb (detrital)           | Boolgeeda Iron Formation, Hamersley Group, W. Australia   | Caquineau et al., 2018                        |
| 3                           | 2308 ± 8        | SHRIMP U-Pb zircon (volcanic)       | Gordon Lake Formation, Huronian Supergroup, N. America    | Rasmussen et al., 2013                        |
| 4                           | 2452.5 ± 6.2    | U-Pb zircon (volcanic)              | Copper Cliff Rhyolite, Huronian Supergroup, N. America    | Ketchum et al., 2013                          |
| 5                           | 2394 ± 26       | Pb-Pb carbonate                     | Moodraai Formation , Transvaal Supergroup, S. Africa      | Bau et al., 1999                              |
| 6                           | 2392 ± 23       | U-Pb carbonate                      | Moodraai Formation , Transvaal Supergroup, S. Africa      | Fairey et al., 2013                           |
| 7                           | 2424 ± 32       | ID-TIMS U-Pb baddeleyite (volcanic) | Ongeluk Formation , Transvaal Supergroup, S. Africa       | Gumsley et al., 2018                          |
| 8                           | 2425.5 ± 2.6    | ID-TIMS U-Pb baddeleyite (volcanic) | Westerberg Sill Complex , Transvaal Supergroup, S. Africa | Kampmann et al., 2015                         |
| 9                           | 2415 ± 6        | SHRIMP U-Pb zircon (volcanic)       | Koegas Subgroup, Transvaal Supergroup, S. Africa          | Gutzmer and Beukes, 1998                      |
| 10                          | 2434 ± 8        | SHRIMP U-Pb zircon (volcanic)       | Koegas Subgroup, Transvaal Supergroup, S. Africa          | Gutzmer and Beukes, 1998; Schier et al., 2018 |
| 11                          | 2479 ± 22       | ID-NTIMS Re-Os                      | Koegas Subgroup, Transvaal Supergroup, S. Africa          | Kendall et al., 2013                          |
| 12                          | 2460 ± 5        | SHRIMP U-Pb zircon (volcanic)       | Asbesheuals Subgroup, Transvaal Supergroup, S. Africa     | Pickard et al., 2003                          |
| 3                           | 2310 ± 9        | SHRIMP U-Pb zircon (volcanic)       | Timeball Hill Formation, Transvaal Supergroup, S. Africa  | Rasmussen et al., 2013                        |
| 13                          | 2316 ± 7        | Re-Os                               | Timeball Hill Formation, Transvaal Supergroup, S. Africa  | Hannah et al., 2004                           |
| 14                          | 2480 ± 6        |                                     | Penge Formation, Transvaal Supergroup, S. Africa          | Nelson et al., 1999                           |
| 15                          | 2434 ± 6.6      | ID-TIMS U-Pb zircon (volcanic)      | Polisarka Volcanic Formation, NW Russian Federation       | Brasier et al., 2013                          |
| 16                          | 2501.5 ± 1.7    | ID-TIMS U-Pb zircon (volcanic)      | Pana Tundra Pluton, NW Russian Federation                 | Amelin et al., 1995                           |



Dataset S1 (separate file): repeat analyses of IAEA-S1 (n=64) between March 2019 and January 2020 giving long-term analytical uncertainty ( $1\sigma$ )

## SI References

1. A. Lepland, *et al.*, “5.1 FAR-DEEP Core Archive and Database” in *Reading the Archive of Earth’s Oxygenation: Volume 2*, V. A. Melezhik, *et al.*, Eds. (Springer, 2013), pp. 493–502.
2. D. E. Canfield, R. Raiswell, J. T. Westrich, C. M. Reaves, R. A. Berner, The use of chromium reduction in the analysis of reduced inorganic sulfur in sediments and shales. *Chem. Geol.* **54**, 149–155 (1986).
3. G. Izon, *et al.*, Multiple oscillations in Neoproterozoic atmospheric chemistry. *Earth Planet. Sci. Lett.* **431**, 264–273 (2015).
4. K. Paiste, *et al.*, Multiple sulphur isotope records tracking basinal and global processes in the 1.98 Ga Zaonega Formation, NW Russia. *Chem. Geol.* **499**, 151–164 (2018).
5. W. U. Ault, M. L. Jensen, Summary of sulfur isotope standards in *Proceedings of the National Science Foundation Symposium at Yale University*, M. L. Jensen, Ed. (1963), pp. 16–29.
6. Y. Ueno, S. Aoyama, Y. Endo, F. Matsushima, J. Foriel, Rapid quadruple sulfur isotope analysis at the sub-micromole level by a flash heating with CoF<sub>3</sub>. *Chem. Geol.* **419**, 29–35 (2015).
7. J. R. Hulston, H. G. Thode, Variations in the S<sup>33</sup>, S<sup>34</sup>, and S<sup>36</sup> contents of meteorites and their relation to chemical and nuclear effects. *J. Geophys. Res.* **70**, 3475–3484 (1965).
8. S. Ono, B. Wing, D. Johnston, J. Farquhar, D. Rumble, Mass-dependent fractionation of quadruple stable sulfur isotope system as a new tracer of sulfur biogeochemical cycles. *Geochim. Cosmochim. Acta* **70**, 2238–2252 (2006).
9. D. T. Johnston, J. Farquhar, K. S. Habicht, D. E. Canfield, Sulphur isotopes and the search for life: Strategies for identifying sulphur metabolisms in the rock record and beyond. *Geobiology* **6**, 425–435 (2008).
10. C. Defouilloy, P. Cartigny, N. Assayag, F. Moynier, J. A. Barrat, High-precision sulfur isotope composition of enstatite meteorites and implications of the formation and evolution of their parent bodies. *Geochim. Cosmochim. Acta* **172**, 393–409 (2016).
11. R. J. Carroll, D. Ruppert, The Use and Misuse of Orthogonal Regression in Linear Errors-in-Variables Models. *Am. Stat.* **50**, 1–6 (1996).
12. D. T. Johnston, Multiple sulfur isotopes and the evolution of Earth’s surface sulfur cycle. *Earth-Science Rev.* **106**, 161–183 (2011).
13. A. T. Brasier, *et al.*, Earth’s earliest global glaciation? Carbonate geochemistry and geochronology of the Polisarka Sedimentary Formation, Kola Peninsula, Russia. *Precambrian Res.* **235**, 278–294 (2013).
